# Supplementary material
Source: PubMed Central journal article supplement (PMC4435696)
Supplement: NIHMS687424-supplement-01.pdf [file NIHMS687424-supplement-01.pdf]

## Neural Antecedents of Emotional Disorders:

### An fMRI Study of Subsyndromal Emotional Symptoms in Adolescent Girls

#### Supplemental Information

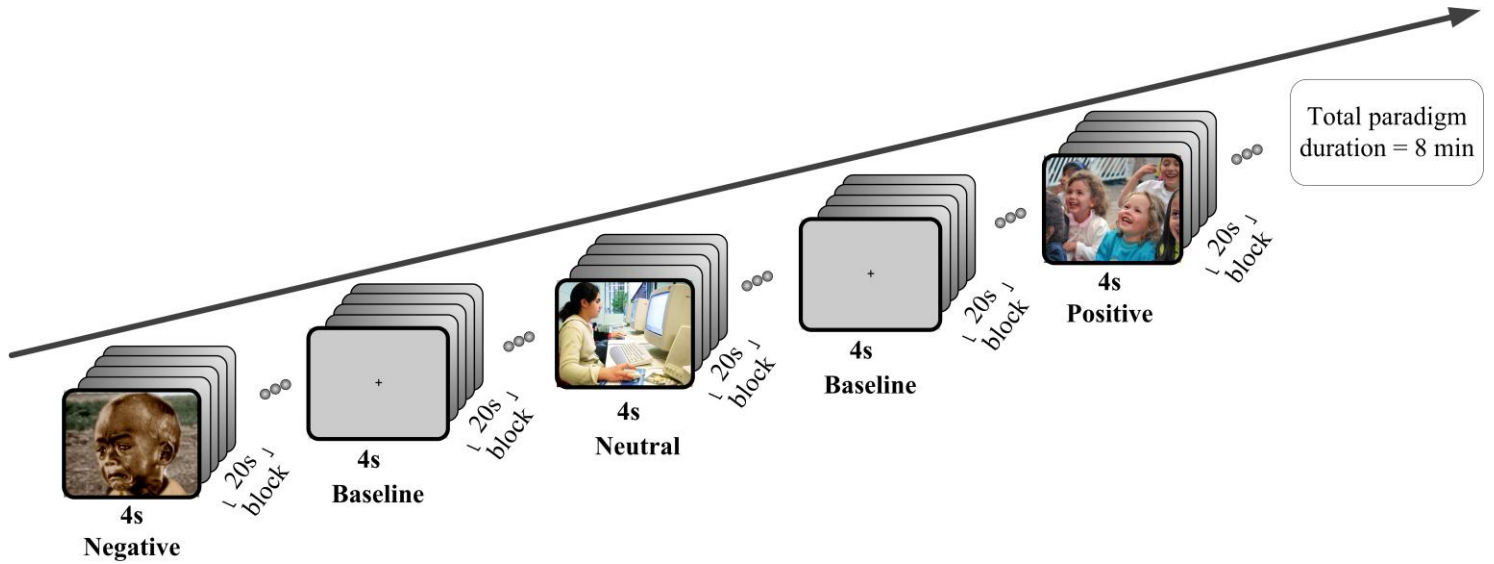

**Figure S1.** Images were displayed in 20-second blocks (5 images per block, and 2 blocks of each valence per run), alternating with 20-second baseline blocks of blank, greyscale images (6 blocks per run), over two functional runs of four minutes each.

## **Data Analysis**

*Approaches undertaken in the analysis:*

Step 1. Based on clinical ratings it was determined which clinical measure most strongly discriminated the two groups (this analysis was conducted by CC).

Step 2. Based on fMRI data the brain regions were identified that displayed significant differences between groups during emotion-processing (this analysis was conducted by PD).

Step 3. To examine the putative neural correlates of the clinical measures that discriminated groups, a correlation analysis was performed between the percent BOLD signal changes in the regions showing significant differences between groups (from Step 2) and clinical measures that differentiated groups (from Step 1).

Step 4. A post-hoc functional connectivity analysis was carried out with the region showing the strongest correlation in Step 3 as the seed region to investigate whether impaired connectivity among the FLN nodes contributes to the clinical symptoms that differentiate groups.

## *fMRI Data Analysis*

### *Pre-processing*

Data analyses were carried out using SPM5 software (<http://www.fil.ion.ucl.ac.uk/spm/software/spm5>). Each subject's functional and structural images were first inspected visually for scanner artifacts and gross anatomical abnormalities, and then re-oriented so that the origin of the image lay within 3cm of the anterior commissure (AC). Functional images were realigned, corrected for slice time variation, and were spatially normalised to a common stereotactic space using the Montreal Neurological Institute (MNI) EPI template. The MNI template employed is that of an adult brain, however, it has been shown that spatial normalisation to an adult-derived template is feasible in children greater than age seven (1). Finally, the functional images were spatially smoothed with a Gaussian kernel of 8mm<sup>3</sup> full width at half maximum.

**Table S2.** Brain regions where BOLD activity differed between adolescents with (ES+) and without (ES-) subsyndromal emotional symptoms during processing of negative and positive (compared to neutral) images.

| Regions                    | Cluster Size | MNI co-ords<br>x,y,z {mm} | voxel<br>T | voxel<br>equivZ | voxel<br>p(unc) |
|----------------------------|--------------|---------------------------|------------|-----------------|-----------------|
| <b>Negative - Neutral</b>  |              |                           |            |                 |                 |
| <b><u>ES+ &lt; ES-</u></b> |              |                           |            |                 |                 |
| <b>Frontal regions</b>     |              |                           |            |                 |                 |
| Inferior Frontal Gyrus     | 151          | 54 36 3                   | 3.8        | 3.57            | 0.000           |
| Anterior Cingulate Gyrus   | 14           | 0 9 30                    | 2.67       | 2.58            | 0.005           |
| <b>Limbic regions</b>      |              |                           |            |                 |                 |
| Hippocampus                | 10           | -21 -36 9                 | 3.52       | 3.33            | 0.000           |
| Hippocampus ventral        | 23           | -15 -33 -3                | 3.08       | 2.94            | 0.002           |
| <b><u>ES+ &gt; ES-</u></b> |              |                           |            |                 |                 |
| <i>None</i>                |              |                           |            |                 |                 |
| <b>Positive - Neutral</b>  |              |                           |            |                 |                 |
| <b><u>ES+ &lt; ES-</u></b> |              |                           |            |                 |                 |
| <i>None</i>                |              |                           |            |                 |                 |
| <b><u>ES+ &gt; ES-</u></b> |              |                           |            |                 |                 |
| <b>Frontal regions</b>     |              |                           |            |                 |                 |
| InferiorFrontal Gyrus      | 19           | -48 33 18                 | 3.27       | 3.11            | 0.001           |
| Anterior Cingulate Gyrus   | 10           | -3 48 -3                  | 2.14       | 2.19            | 0.014           |

**Table S3.** Regions in the fronto-limbic network that displayed significant neural activity during processing of emotional images as compared to neutral images in all subjects.

| Regions                   | Cluster | MNI co-ords | voxel | voxel             | p-value |
|---------------------------|---------|-------------|-------|-------------------|---------|
|                           | Size    | x,y,z {mm}  | F     | equivZ (FDR-corr) |         |
| <b>Negative - Neutral</b> |         |             |       |                   |         |
| <b>Frontal regions</b>    |         |             |       |                   |         |
| Inferior frontal gyrus    | 429     | 42 18 24    | 84.6  | 7.08              | 0.000   |
|                           | 59      | -42 45 9    | 14.12 | 3.35              | 0.002   |
| Anterior Cingulate        | 204     | 6 51 24     | 46.68 | 5.7               | 0.000   |
| <b>Limbic regions</b>     |         |             |       |                   |         |
| Amygdala                  | 74      | -21 -3 -24  | 80.12 | 6.95              | 0.000   |
|                           | 86      | 24 -3 -21   | 47.86 | 5.75              | 0.000   |
| Hippocampus               | 217     | -18 -3 -21  | 71.65 | 6.68              | 0.000   |
|                           | 188     | 21 -6 -21   | 70.81 | 6.66              | 0.000   |
| Insula                    | 110     | -30 15 -21  | 30.19 | 4.76              | 0.001   |
|                           | 89      | 30 12 -21   | 23.95 | 4.30              | 0.001   |
| <b>Positive - Neutral</b> |         |             |       |                   |         |
| <b>Frontal regions</b>    |         |             |       |                   |         |
| Inferior frontal gyrus    | 30      | -45 36 21   | 16.71 | 3.64              | 0.012   |
| Anterior Cingulate        | 222     | 0 48 0      | 23.26 | 4.24              | 0.012   |

## References

1. Kang HC, Burgund ED, Lugar HM, Petersen SE, Schlaggar BL (2003): Comparison of functional activation foci in children and adults using a common stereotactic space. *Neuroimage*. 19:16-28.

**Manuscript # BPS-D-12-01591**  
**In this issue statement**

Das et al. investigates the emotional networks of the adolescent brain, using fMRI so as to identify the neural antecedents of common mental disorders such as anxiety and depression. They found that adolescents with subsyndromal emotional symptoms had increased frontal activity when processing positive emotions and decreased frontal and limbic activity when processing negative emotions and that trait anxiety correlated negatively with hippocampal neural activity when processing negative emotions. These findings of differential activity in the emotional fronto-limbic network are potential precursors to the development of emotional disorders and should be targeted in future studies.

**Manuscript Submission Form- PD**

**[Click here to download Manuscript Submission Form: Manuscript subform\\_PD-signed.pdf](#)**



**Manuscript Submission Form- CC**

**[Click here to download Manuscript Submission Form: Manuscript subform\\_CC-signed.pdf](#)**

**Manuscript Submission Form- DB**

**[Click here to download Manuscript Submission Form: Manuscript subform\\_DB-signed.pdf](#)**

**Manuscript Submission Form- MT**

**[Click here to download Manuscript Submission Form: Manuscript subform\\_MT-signed.pdf](#)**

**Manuscript Submission Form- KLP**

**[Click here to download Manuscript Submission Form: Manuscript subform\\_LP-signed.pdf](#)**

**Manuscript Submission Form- VC**

**[Click here to download Manuscript Submission Form: Manuscript subform\\_VC-signed.pdf](#)**

**Manuscript Submission Form- GM**

**[Click here to download Manuscript Submission Form: Manuscript subform\\_GM-signed.pdf](#)**
